# Supplementary material for: Design of an Herbal Preparation Composed by a Combination of Ruscus aculeatus L. and Vitis vinifera L. Extracts, Magnolol and Diosmetin to Address Chronic Venous Diseases through an Anti-Inflammatory Effect and AP-1 Modulation
Source: MDPI journal article supplement (doi:10.3390/plants12051051), 2023-02-26
Supplement: s1 [file s1]

## *Supplementary materials*

**Design of an herbal preparation composed by a combination of *Ruscus aculeatus* L. and *Vitis vinifera* L. extracts, magnolol and diosmetin to address chronic venous diseases through an anti-inflammatory effect and AP-1 modulation**

**Figure S1:** LC-MS analysis of *Vitis vinifera* seeds and *Ruscus aculeatus* leaf extracts

**Figure S2:** Western blot analysis of NF- $\kappa$ B in HUVECs nucleus and cytosol after different treatments.

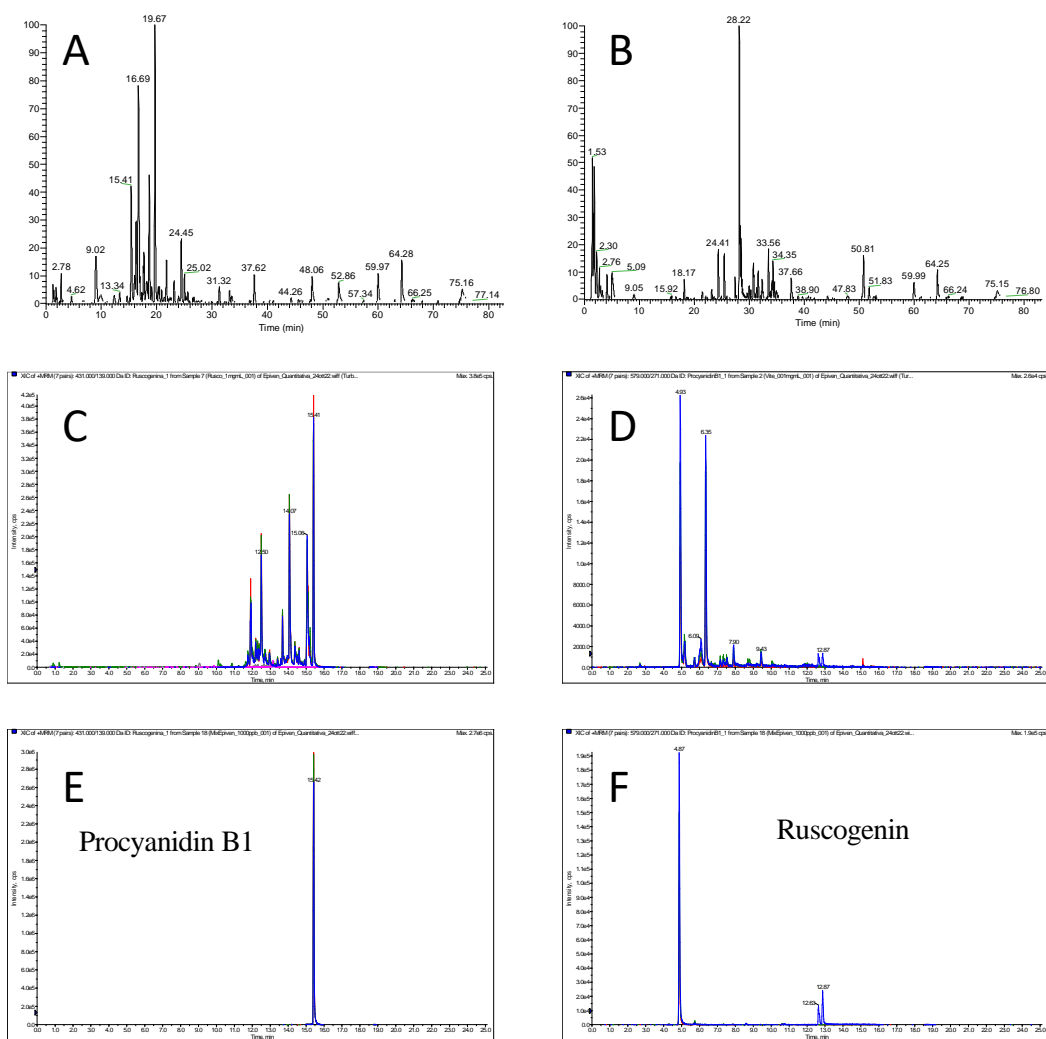

**Figure S1:** LC-MS analysis of *Vitis vinifera* seeds and *Ruscus aculeatus* leaf extracts. TIC and MRM chromatograms acquired for the extracts of *V. vinifera* (A and C) and *R. aculeatus* (B and D) are reported. MRM chromatograms of pure procyanidin B1 (E) and ruscogenin (F) are also shown.

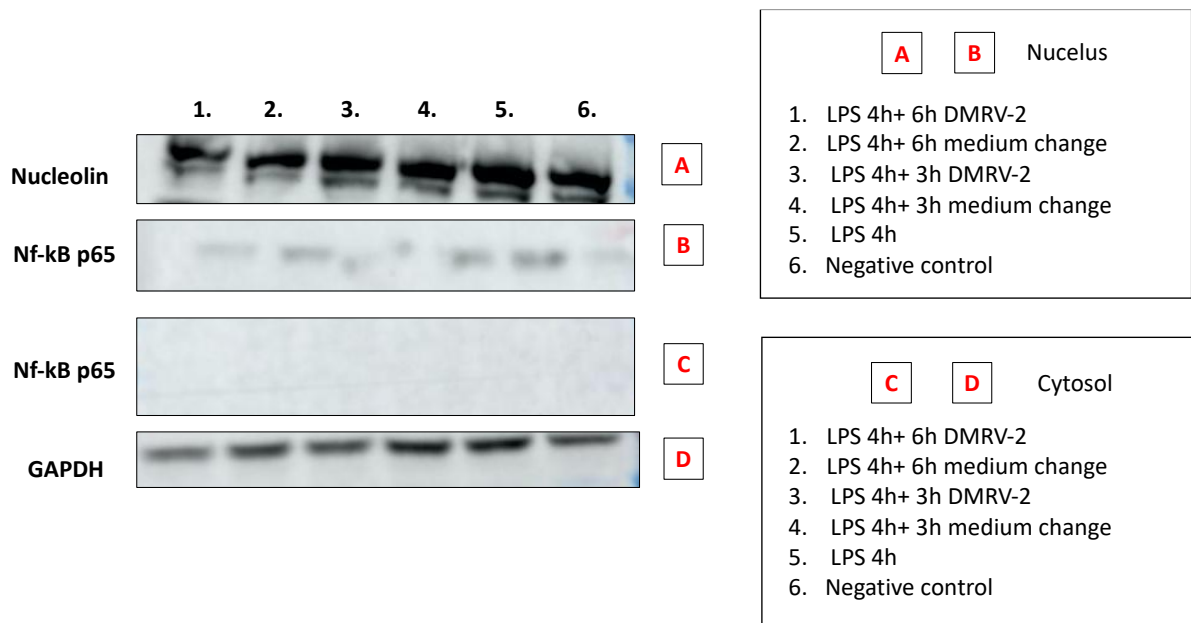

**Figure S2:** Western blot analysis of NF-kB in HUVECs nucleus and cytosol after different treatments. In particular, the concentration of NF-kB was measured in untreated cells (6), cells subjected to 4h of LPS-induced inflammation (5), and then to incubation with DMRV-2 for 3 h (3) or 6 h (1) or to change of the medium (2 and 4).
